# Supplementary material
Source: PubMed Central journal article supplement (PMC4624314)
Supplement: NIHMS499233-supplement-supplement_1.pdf [file NIHMS499233-supplement-supplement_1.pdf]

Supplementary Figure 1. Figure 1 shows an agarose gel of the results of genotyping *Ndst1* heterozygous and homozygous animals. The upper gel shows the bands for PCR products of 250bp (wild type) and 350bp (floxed allele) for *Ndst1*. The lower gel shows PCR products for the same animals genotyped using primer sets for the 2.5P-Cre transgene (268 bp).

Supplementary Figure 2. Panels A and B are photomicrographs of frozen sections of *NDST1*<sup>+/+</sup> (A) and *NDST1*<sup>-/-</sup> (B) kidneys that were stained with Oil Red O. The arrows in each panel point to the vacuoles present in the renal tubule epithelium. Although Oil Red O stains smaller lysosomes within the tissue section, the larger vacuoles are predominately negative for the staining. Final magnification 400x. Panels C-F are photomicrographs of 0.5µm thick plastic-embedded sections of *NDST1*<sup>+/+</sup> (C & E) and *NDST1*<sup>-/-</sup> (D & F) kidneys from animals 9 (C & D) and 12 (E & F) months of age. Panels D & F show the presence of darkly stained lysosomes within the epithelial cells of the proximal tubules.

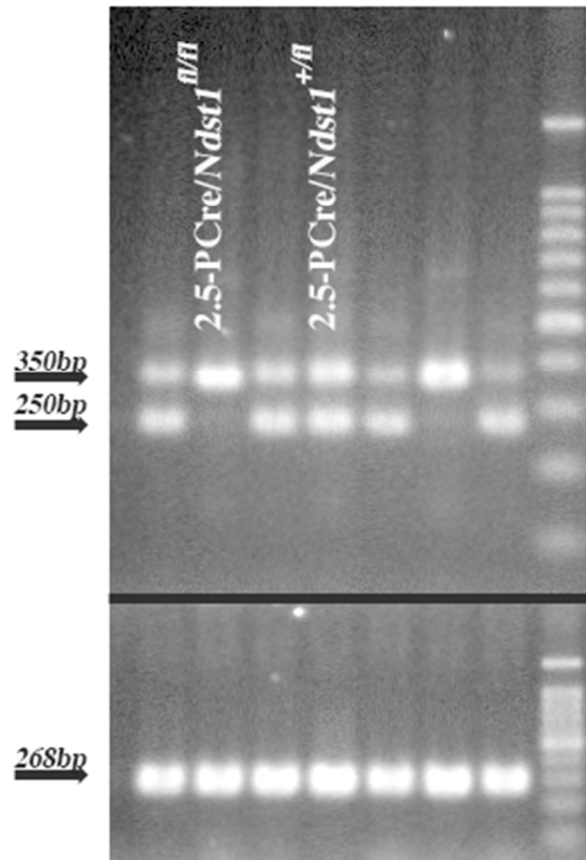

Supplementary Figure 1. Figure 1 shows an agarose gel of the results of genotyping NdSt1 heterozygous and homozygous animals. The upper gel shows the bands for PCR products of 250bp (wild type) and 350bp (floxed allele) for NdSt1. The lower gel shows PCR products for the same animals genotyped using primer sets for the 2.5P-Cre transgene (268 bp).  
46x75mm (167 x 167 DPI)

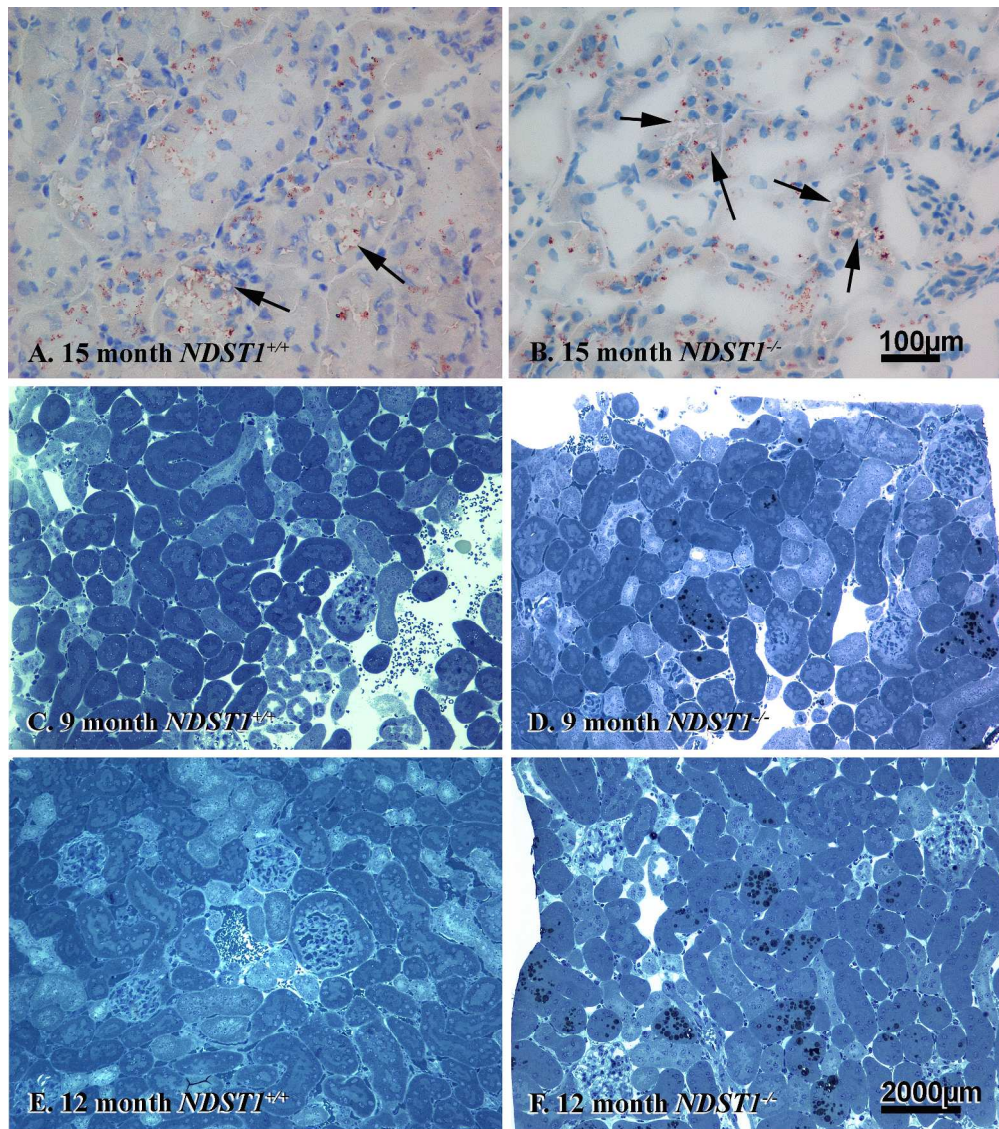

305x343mm (266 x 266 DPI)
